# Supplementary material for: SolPredictor: Predicting Solubility with Residual Gated Graph Neural Network
Source: MDPI journal article supplement (doi:10.3390/ijms25020715), 2024-01-05

## Supporting information: Optuna visualizations.

Slice Plot

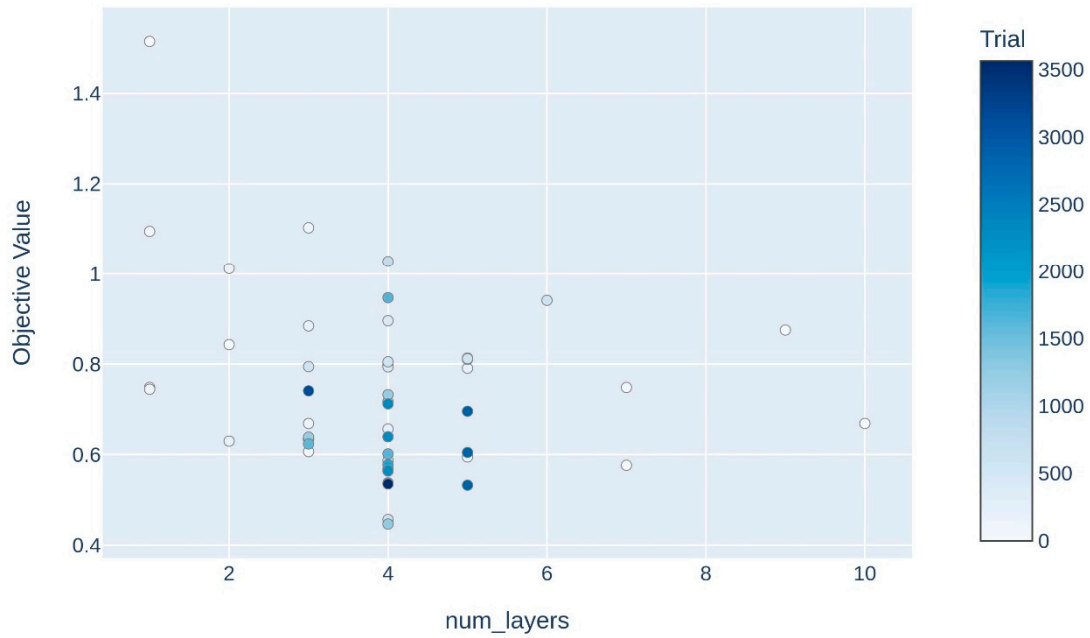

Parallel Coordinate Plot

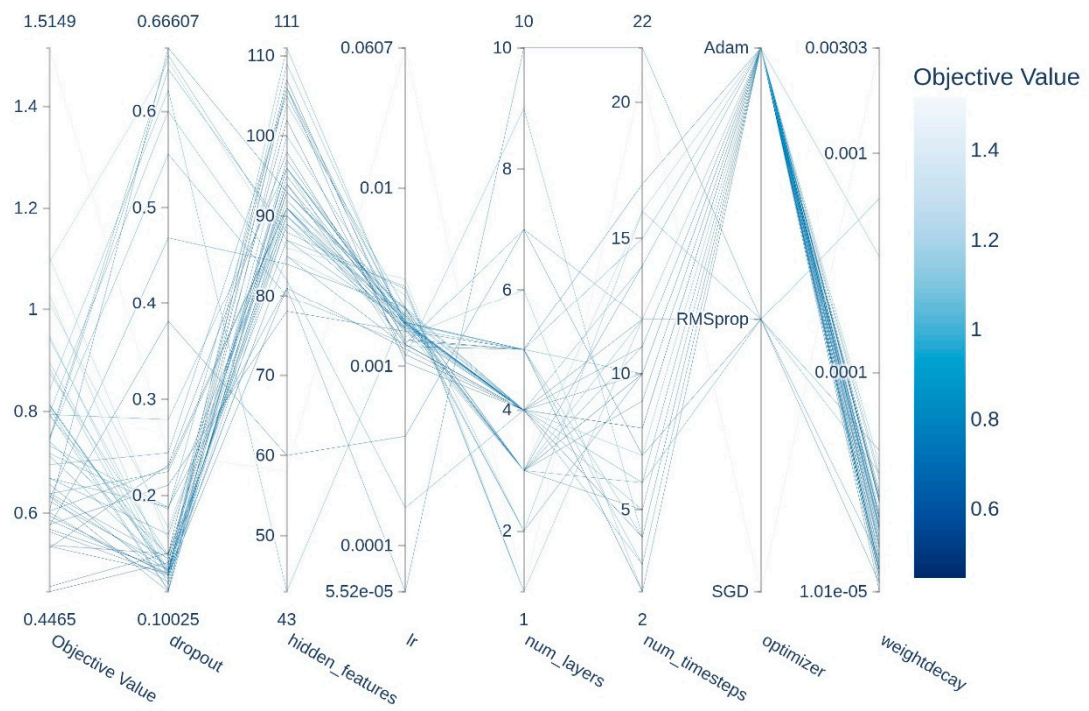

Optimization History Plot

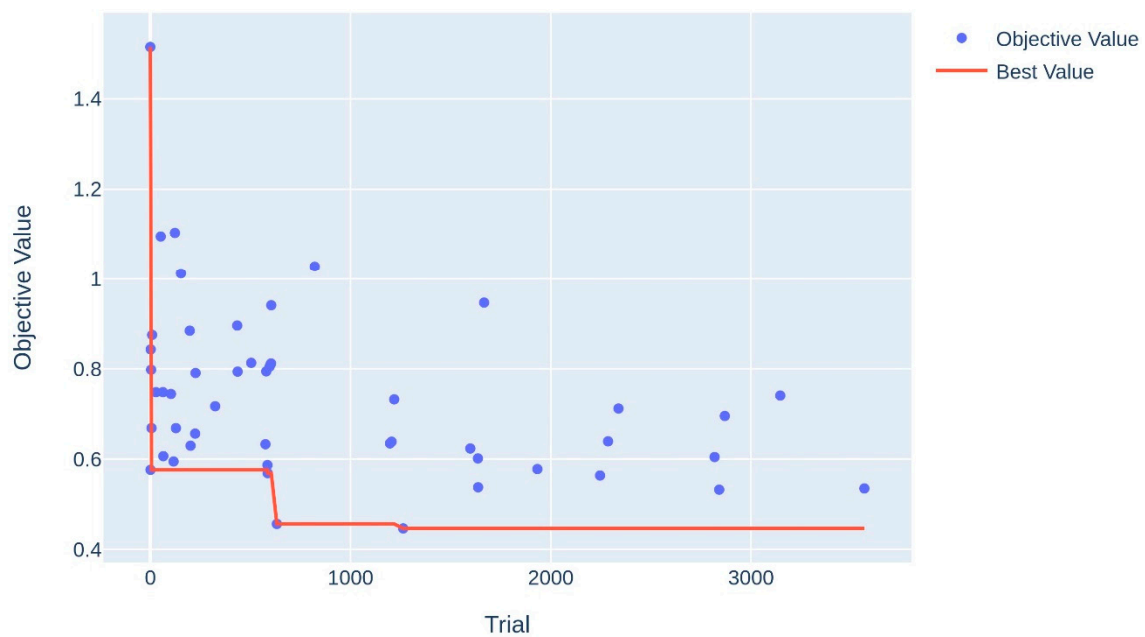

Supplement: s1 [file s1]
